# Supplementary material for: IFIT5 Participates in the Antiviral Mechanisms of Rainbow Trout Red Blood Cells
Source: Front Immunol. 2019 Apr 16;10:613. doi: 10.3389/fimmu.2019.00613 (PMC6476978; doi:10.3389/fimmu.2019.00613)
Supplement: Supplementary file 1 [file Table_1.XLSX]

## Sheet: Protein-List
Main Accession	Description	MW (Da)	pI	Protein Score	PSMs	Number of peptides	emPAI	Coverage
P24378	Nucleoprotein OS=Viral hemorrhagic septicemia virus (strain 07-71) GN=N PE=2 SV=1^Atr|Q77AU4	44570	5.07	3802.61	149	43	162	76.7
P04264	Keratin, type II cytoskeletal 1 OS=Homo sapiens GN=KRT1 PE=1 SV=6	66170	8.15	4189.66	123	48	19.21	61.5
I0DHI0	Nucleoprotein OS=Viral hemorrhagic septicemia virus PE=4 SV=1	44070	5.22	61.63	85	1	31.12	50
A0A060XSW0	Uncharacterized protein OS=Oncorhynchus mykiss GN=GSONMT00052298001 PE=3 SV=1	16257	6.57	170.28	82	2	195.91	95.3
C1BEM6	Hemoglobin subunit beta OS=Oncorhynchus mykiss GN=HBB PE=2 SV=1	16244	6.57	2002.85	82	22	195.91	95.3
C1BG67	Hemoglobin subunit beta-4 OS=Oncorhynchus mykiss GN=HBB4 PE=2 SV=1	16247	6.57	113.5	82	1	195.91	95.3
P02141	Hemoglobin subunit beta-4 OS=Oncorhynchus mykiss GN=hbb4 PE=1 SV=3	16243	6.57	174.19	81	2	118.06	89.9
P02769	Serum albumin (Laboratory-Cont) OS=Bos taurus GN=ALB PE=1 SV=4^Asw|P02769	71244	5.82	2878.68	81	37	11.19	70.8
P27371	Nucleoprotein OS=Viral hemorrhagic septicemia virus (strain Makah) GN=N PE=2 SV=1	44267	5.3	55.66	80	1	13.97	40.6
P13645	Keratin, type I cytoskeletal 10 OS=Homo sapiens GN=KRT10 PE=1 SV=6	59020	5.13	2986.46	73	35	10.64	53.6
C1BEX3	Hemoglobin subunit beta-4 OS=Oncorhynchus mykiss GN=HBB4 PE=2 SV=1	16247	6.57	75.82	71	1	118.06	95.3
P35908	Keratin, type II cytoskeletal 2 epidermal OS=Homo sapiens GN=KRT2 PE=1 SV=2	65678	8.07	2555.16	67	29	9.31	78.1
P35527	Keratin, type I cytoskeletal 9 OS=Homo sapiens GN=KRT9 PE=1 SV=3	62255	5.14	3351.5	64	35	16.46	88.4
A0A0A0MS14	Immunoglobulin heavy variable 1-45 OS=Homo sapiens GN=IGHV1-45 PE=3 SV=1	13614	9.2	214.24	42	3	0.81	9.4
P00761	Trypsin (Laboratory-Cont) OS=Sus scrofa PE=1 SV=1^Asw|P00761	25078	7	804.54	40	10	2.15	31.6
A0A060XZ25	Uncharacterized protein OS=Oncorhynchus mykiss GN=GSONMT00052301001 PE=3 SV=1	15992	9.04	307.85	31	4	58.12	91.8
A0A060YEC0	Uncharacterized protein OS=Oncorhynchus mykiss GN=GSONMT00016594001 PE=3 SV=1	16048	9.04	968.13	31	12	56.52	91.8
P02533	Keratin, type I cytoskeletal 14 OS=Homo sapiens GN=KRT14 PE=1 SV=4	51872	5.09	633.07	27	9	3.93	43
A0A060YP37	Uncharacterized protein OS=Oncorhynchus mykiss GN=GSONMT00058133001 PE=3 SV=1	16046	9.04	216.69	25	3	73.1	91.8
P13647	Keratin, type II cytoskeletal 5 OS=Homo sapiens GN=KRT5 PE=1 SV=3	62568	7.59	527.51	25	9	2.52	30.7
A0A0P7TS35	Histone H4 (Fragment) OS=Scleropages formosus GN=Z043_126092 PE=3 SV=1	18860	10.94	804.54	23	10	19.77	46.5
H2RW50	Histone H4 OS=Takifugu rubripes PE=3 SV=1	24333	10.6	130.03	23	2	9.64	36.8
P02768	Serum albumin OS=Homo sapiens GN=ALB PE=1 SV=2	71317	5.92	356.9	23	6	2.02	36.9
P02538	Keratin, type II cytoskeletal 6A OS=Homo sapiens GN=KRT6A PE=1 SV=3	60293	8.09	233.05	22	3	1.8	28.7
P02142	Hemoglobin subunit beta-1 OS=Oncorhynchus mykiss GN=hbb1 PE=1 SV=1	15928	9.27	113.53	21	2	59.8	92.5
C1BG49	Hemoglobin subunit alpha-4 OS=Oncorhynchus mykiss GN=HBA4 PE=2 SV=1	15929	7.88	56.5	20	1	26.51	55.2
A0A0B5E7Z4	Beta-actin OS=Tachysurus fulvidraco PE=2 SV=1	42065	5.38	674.53	19	9	3.36	46.1
C1BG02	Hemoglobin subunit alpha-4 OS=Oncorhynchus mykiss GN=HBA4 PE=2 SV=1	15981	8.65	523.05	19	6	34.51	72.7
P08779	Keratin, type I cytoskeletal 16 OS=Homo sapiens GN=KRT16 PE=1 SV=4	51578	4.99	215.84	19	2	2.91	41
P14527	Hemoglobin subunit alpha-4 OS=Oncorhynchus mykiss GN=hba4 PE=1 SV=1	15850	8.65	345.15	19	4	35.38	73.2
A0A0P7UMM5	Actin, cytoplasmic 2-like OS=Scleropages formosus GN=Z043_118570 PE=3 SV=1	44910	5.48	90.58	18	1	2.97	43.1
A0A060XSB4	Uncharacterized protein OS=Oncorhynchus mykiss GN=GSONMT00052297001 PE=3 SV=1	15942	8.63	188.65	17	2	26.51	55.2
A0A060XSJ5	Uncharacterized protein OS=Oncorhynchus mykiss GN=GSONMT00009493001 PE=3 SV=1	16009	8.67	184.91	16	3	20.32	55.2
C1BG68	Hemoglobin subunit alpha-1 OS=Oncorhynchus mykiss GN=HBA1 PE=2 SV=1	15071	8.86	580.76	16	7	10.32	67.1
Q5I122	Hemoglobin beta chain OS=Sciaenops ocellatus PE=2 SV=1	16380	8.71	58.31	16	1	1.11	27.7
B2BP38	Hemoglobin beta chain OS=Pimephales promelas PE=2 SV=1	16280	6.89	87.81	15	1	0.65	13.6
Q5GAX6	Histone H3a (Fragment) OS=Pterophyllum scalare PE=3 SV=1	12409	11.02	472.2	15	8	48.89	30
A0A1D8EJ41	Beta-actin (Fragment) OS=Poecilia formosa PE=2 SV=1	27501	5.3	103.3	14	1	3.45	49.4
A0A076EB04	Histone H3 (Fragment) OS=Blepsias cirrhosus PE=3 SV=1	12448	11.02	54.87	12	1	17.77	30
Q5GAW2	Histone H3 (Fragment) OS=Oreochromis mossambicus PE=3 SV=1	12411	11.02	58.41	12	1	17.77	30
A0A0G2QMP1	Histone H3 (Fragment) OS=Monocentris japonica PE=3 SV=1	12398	10.83	74.9	11	1	48.89	32.7
Q5SEP6	Histone H3 (Fragment) OS=Grammistes sexlineatus PE=3 SV=1	12438	10.83	54.87	11	1	17.77	30
A0A0P7V3N2	Keratin, type II cytoskeletal 8-like (Fragment) OS=Scleropages formosus GN=Z043_111930 PE=3 SV=1	55997	5.22	72.01	10	1	0.45	7.5
P01860	Immunoglobulin heavy constant gamma 3 OS=Homo sapiens GN=IGHG3 PE=1 SV=2	42287	8.23	131.19	10	2	0.48	16.4
Q7T2K6	Carbonic anhydrase 2 OS=Oncorhynchus mykiss GN=GSONMT00073683001 PE=2 SV=1	28880	7.66	399.32	10	5	2.61	39.2
A0A0P7W925	Histone H2A (Fragment) OS=Scleropages formosus GN=Z043_124827 PE=3 SV=1	22693	10.61	80.78	9	1	1.47	22.3
Q6R4A2	Cytoplasmic carbonic anhydrase OS=Oncorhynchus mykiss GN=CA2 PE=2 SV=1	28391	5.46	220.15	9	3	1.76	24.7
A0A060Y6A8	Uncharacterized protein OS=Oncorhynchus mykiss GN=GSONMT00055804001 PE=3 SV=1	19029	12.16	126.24	8	2	1.37	24.7
A0A0B4J1Y9	Immunoglobulin heavy variable 3-72 OS=Homo sapiens GN=IGHV3-72 PE=3 SV=1	13366	7.68	57.68	8	1	0.36	9.2
A0A160DAA8	Beta-actin (Fragment) OS=Dormitator latifrons PE=3 SV=1^Atr|A0A166T9F6^Atr|A0A160DAG2	18327	5.95	71.44	8	1	6.45	49.4
A0A160DAB7	Beta-actin (Fragment) OS=Dormitator maculatus PE=3 SV=1	18285	5.95	71.05	8	1	6.45	49.4
Q7LZL9	Hemoglobin A1-4 beta chain (Fragment) OS=Oncorhynchus nerka PE=1 SV=1	3632	4.79	53.41	8	1	1434.26	50
R4GE02	Uncharacterized protein OS=Danio rerio GN=si:ch211-113a14.11 PE=1 SV=1	27133	10.17	71.95	8	1	1.89	35.5
C1BF11	Hemoglobin subunit alpha-4 OS=Oncorhynchus mykiss GN=HBA4 PE=2 SV=1	16044	7.86	86.87	7	1	8.77	54.5
X1WG17	Histone H2B (Fragment) OS=Danio rerio GN=hist1h2ba PE=1 SV=1	13680	10.37	252.86	7	4	4.96	49.6
A0A060WK77	Tubulin beta chain OS=Oncorhynchus mykiss GN=GSONMT00072337001 PE=3 SV=1	55177	4.96	127.12	6	2	0.46	20.7
A0A0K0NJB6	Type I cytokeratin (Fragment) OS=Ptychobarbus dipogon PE=3 SV=1	13804	4.74	62.01	6	1	0.8	13.2
P06350	Histone H1 OS=Oncorhynchus mykiss PE=1 SV=2	20791	10.97	181.43	6	3	2.27	24.2
A0A060XRV6	Uncharacterized protein OS=Oncorhynchus mykiss GN=GSONMT00052299001 PE=3 SV=1	15141	9.19	56.74	5	1	4.04	34.3
A0A0G2JPR0	Complement C4-A OS=Homo sapiens GN=C4A PE=1 SV=1	194351	6.59	183.13	5	3	0.11	3.4
A0A0G2QMM2	Histone H3 (Fragment) OS=Allocyttus folletti PE=3 SV=1	7393	12.25	52.87	5	1	13.5	33.3
E0WER5	Matrix protein OS=Viral hemorrhagic septicemia virus GN=m PE=4 SV=1	22536	9.36	189.89	5	3	2.58	50.7
E9PFZ2	Ceruloplasmin OS=Homo sapiens GN=CP PE=1 SV=1	109493	5.49	196.02	5	3	0.16	7.2
M3ZFN0	Uncharacterized protein OS=Xiphophorus maculatus PE=3 SV=1	43246	4.96	146.25	5	2	0.21	7.9
Q2TS51	Elongation factor 1-alpha OS=Pimephales promelas PE=2 SV=1	50229	9.16	169.95	5	3	0.39	16.2
A0A0A0MS08	Ig gamma-1 chain C region (Fragment) OS=Homo sapiens GN=IGHG1 PE=1 SV=1	44511	6.55	223.99	4	3	0.59	15.8
A0A0C5BIF3	Heat shock protein 70 OS=Huso dauricus GN=HSP70 PE=2 SV=1	71315	5.29	139.61	4	2	0.19	6
A0A0E9WET2	Uncharacterized protein OS=Anguilla anguilla PE=3 SV=1	16464	10.14	136.51	4	2	1.7	25.3
A0A146MHY4	78 kDa glucose-regulated protein (Fragment) OS=Fundulus heteroclitus PE=3 SV=1	55042	5.46	61.93	4	1	0.16	5.8
A6QL59	Histone H2A OS=Danio rerio GN=zgc:165551 PE=2 SV=1	13623	11.07	80.78	4	1	0.81	36.2
A0A060W847	Uncharacterized protein OS=Oncorhynchus mykiss GN=GSONMT00068777001 PE=4 SV=1	158872	5.19	50.73	3	1	0.05	0.5
A0A096LTG7	Uncharacterized protein OS=Poecilia formosa PE=3 SV=1	81821	6.17	100.79	3	1	0.05	2
A0A0S7KU54	CERU OS=Poeciliopsis prolifica GN=CERU PE=3 SV=1	108008	6.38	91.56	3	1	0.08	3
A0A146YS88	Actin, cytoplasmic 2 (Fragment) OS=Fundulus heteroclitus PE=3 SV=1	45146	5.57	62.81	3	1	0.32	5.2
A0A1A8BA63	Coagulation factor V OS=Nothobranchius furzeri GN=F5 PE=3 SV=1	224821	6.58	91.56	3	1	0.02	0.7
A0A1A8ETV4	Ras association (RalGDS/AF-6) domain family (N-terminal) member 8 OS=Nothobranchius korthausae GN=CABZ01003826.1 PE=4 SV=1	50950	6.14	54.64	3	1	0.08	1.5
H2TAQ0	Uncharacterized protein OS=Takifugu rubripes GN=slk PE=4 SV=1	111762	5.75	50.73	3	1	0.08	0.7
P01023	Alpha-2-macroglobulin OS=Homo sapiens GN=A2M PE=1 SV=3	164613	6.03	53.24	3	1	0.05	1
P01024	Complement C3 OS=Homo sapiens GN=C3 PE=1 SV=2	188569	6.02	92.98	3	1	0.07	2.3
P04114	Apolipoprotein B-100 OS=Homo sapiens GN=APOB PE=1 SV=2	516651	6.58	112.12	3	2	0.05	2.4
P06702	Protein S100-A9 OS=Homo sapiens GN=S100A9 PE=1 SV=1	13291	5.71	75.25	3	1	0.84	24.6
P08238	Heat shock protein HSP 90-beta OS=Homo sapiens GN=HSP90AB1 PE=1 SV=4	83554	4.97	100.79	3	1	0.35	9
W5M762	Uncharacterized protein OS=Lepisosteus oculatus PE=4 SV=1	112229	5.81	50.73	3	1	0.08	1.4
W5MJR6	Uncharacterized protein OS=Lepisosteus oculatus PE=4 SV=1	52823	9.27	52.46	3	1	0.08	1.5
A0A060WX95	Uncharacterized protein OS=Oncorhynchus mykiss GN=GSONMT00029674001 PE=3 SV=1	42899	4.78	77.13	2	1	0.62	18.3
A0A060XXQ9	Uncharacterized protein OS=Oncorhynchus mykiss GN=GSONMT00031819001 PE=4 SV=1	13085	8.58	56.52	2	1	0.36	9.4
A0A060Y7C6	40S ribosomal protein S3a OS=Oncorhynchus mykiss GN=RPS3A PE=3 SV=1^Atr|A9Z0N3	30311	9.75	121.36	2	2	0.31	11.7
A0A060YDT1	Uncharacterized protein OS=Oncorhynchus mykiss GN=GSONMT00005272001 PE=4 SV=1	22057	5.55	63.54	2	1	0.75	19.8
A0A075B6S2	Immunoglobulin kappa variable 2D-29 OS=Homo sapiens GN=IGKV2D-29 PE=3 SV=1	13249	6.54	99.1	2	1	0.85	16.7
A0A087XME4	40S ribosomal protein S4 OS=Poecilia formosa PE=3 SV=1	29775	10.18	51.34	2	1	0.51	11.4
C1BLG8	Glyceraldehyde-3-phosphate dehydrogenase OS=Osmerus mordax GN=G3P PE=2 SV=1	36419	6.08	57.68	2	1	0.57	14
C1J0I5	Enolase 1 isoform a (Fragment) OS=Gillichthys mirabilis PE=2 SV=1	43910	5.16	114.38	2	2	0.21	7.5
G3P570	Uncharacterized protein OS=Gasterosteus aculeatus PE=4 SV=1	182161	5.57	54	2	1	0.02	0.7
H2LLZ8	Uncharacterized protein OS=Oryzias latipes GN=eno1 PE=3 SV=1	45267	6.36	55.54	2	1	0.2	7.3
H7C3T4	Peroxiredoxin-4 (Fragment) OS=Homo sapiens GN=PRDX4 PE=1 SV=1	18485	5.56	63.54	2	1	0.55	11.2
I6WP32	Cardiac muscle myosin heavy chain 6 alpha (Fragment) OS=Hoplostethus atlanticus GN=myh6 PE=4 SV=1	24725	6.38	53.02	2	1	0.39	3.2
M4A1M1	Transketolase OS=Xiphophorus maculatus PE=3 SV=1	68691	6.38	49.54	2	1	0.06	3.7
P01834	Immunoglobulin kappa constant OS=Homo sapiens GN=IGKC PE=1 SV=2	11929	6.11	89.37	2	1	0.98	57
P01861	Immunoglobulin heavy constant gamma 4 OS=Homo sapiens GN=IGHG4 PE=1 SV=1	36431	7.18	66.82	2	1	0.57	21.1
P02662	Alpha-S1-casein (Laboratory-Cont) OS=Bos taurus GN=CSN1S1 PE=1 SV=2^Asw|P02662	24570	4.98	102.62	2	2	0.65	26.2
P02666	Beta-casein (Laboratory-Cont) OS=Bos taurus GN=CSN2 PE=1 SV=2^Asw|P02666	25148	5.26	73.72	2	1	0.39	14.7
P31151	Protein S100-A7 OS=Homo sapiens GN=S100A7 PE=1 SV=4	11578	6.28	107.46	2	2	1.01	22.8
Q1JQ20	Synembryn-like OS=Danio rerio GN=ric8b PE=2 SV=1	60110	5.37	53.02	2	1	0.15	1.3
Q5D862	Filaggrin-2 OS=Homo sapiens GN=FLG2 PE=1 SV=1	249296	8.45	76.21	2	1	0.02	0.5
W5JYL4	Uncharacterized protein OS=Astyanax mexicanus PE=3 SV=1	16415	10.26	64.9	2	1	0.64	13
W5LYG2	Uncharacterized protein OS=Lepisosteus oculatus PE=4 SV=1	25092	7.03	100.9	2	2	1.27	11.6
W5N1H4	Annexin OS=Lepisosteus oculatus PE=3 SV=1	75881	5.43	53.02	2	1	0.12	2.6
A0A060W713	Uncharacterized protein OS=Oncorhynchus mykiss GN=GSONMT00068025001 PE=4 SV=1	22988	8.31	82.22	1	1	0.2	6.8
A0A060WXW6	Uncharacterized protein OS=Oncorhynchus mykiss GN=GSONMT00013312001 PE=3 SV=1	37366	9.71	58.52	1	1	0.12	4.3
A0A060XGK1	Proteasome subunit alpha type OS=Oncorhynchus mykiss GN=GSONMT00008054001 PE=3 SV=1^Atr|B5XDD4	27876	7.72	51.29	1	1	0.16	5.7
A0A060XMF0	Ribosomal protein L15 OS=Oncorhynchus mykiss GN=GSONMT00054816001 PE=3 SV=1	24269	11.51	70.82	1	1	0.66	15.7
A0A060XZL2	Uncharacterized protein (Fragment) OS=Oncorhynchus mykiss GN=GSONMT00013545001 PE=3 SV=1	127644	6.5	64.09	1	1	0.1	3.2
A0A060Y7V1	Uncharacterized protein OS=Oncorhynchus mykiss GN=GSONMT00046116001 PE=4 SV=1	24521	10.61	59.41	1	1	0.18	11.1
A0A068FNU8	Interferon-induced protein with tetratricopeptide repeats OS=Danio rerio GN=ifit9 PE=2 SV=1	54764	8.2	50.92	1	1	0.08	1.7
A0A087XVE3	Uncharacterized protein OS=Poecilia formosa PE=3 SV=2	30410	10.22	56.58	1	1	0.31	7.9
A0A0F8AWP4	Ig kappa chain V-IV region JI OS=Larimichthys crocea GN=EH28_05339 PE=4 SV=1	14331	6.03	48.16	1	1	0.33	7.1
A0A0P7TLE4	40S ribosomal protein S26 OS=Scleropages formosus GN=Z043_120130 PE=3 SV=1	13338	11.01	56.55	1	1	0.36	13
A0A0S7EQ42	Ribosomal protein L15 OS=Poeciliopsis prolifica GN=RL15 PE=3 SV=1	24216	11.57	70.82	1	1	0.66	15.7
A0A143WEA0	Ribosomal protein L7 (Fragment) OS=Anguilla rostrata GN=rpl7 PE=2 SV=1	22691	10.24	47.96	1	1	1.06	29.9
A0A1A7WCM1	Progesterone immunomodulatory binding factor 1 OS=Aphyosemion striatum GN=PIBF1 PE=4 SV=1	90181	6.18	50.5	1	1	0.05	1.2
A0A1A7WE08	Zgc:92533 OS=Aphyosemion striatum GN=ZGC:92533 PE=3 SV=1	46789	5.11	60.9	1	1	0.19	2.8
A0A1A7ZZ80	Myomesin 3 (Fragment) OS=Nothobranchius furzeri GN=MYOM3 PE=4 SV=1	30341	5.51	54.62	1	1	0.15	8
C9JC84	Fibrinogen gamma chain OS=Homo sapiens GN=FGG PE=1 SV=1	52932	5.37	55.36	1	1	0.08	4.3
F8U8U5	Poly ubiquitin (Fragment) OS=Chelon labrosus PE=2 SV=1	12094	8.23	64.09	1	1	1.73	38.3
F8W696	Apolipoprotein A-I OS=Homo sapiens GN=APOA1 PE=1 SV=1	28005	5.8	47.21	1	1	0.34	7.3
F8W6P5	Hemoglobin subunit beta (Fragment) OS=Homo sapiens GN=HBB PE=1 SV=1	9664	6.25	65.67	1	1	1.3	28.9
G3P4H1	Uncharacterized protein (Fragment) OS=Gasterosteus aculeatus PE=4 SV=1	12434	5.76	48.16	1	1	0.39	7.8
H0Y7L5	Apolipoprotein E (Fragment) OS=Homo sapiens GN=APOE PE=1 SV=2	30733	7.74	55.53	1	1	0.14	3.3
H0YKS4	Annexin (Fragment) OS=Homo sapiens GN=ANXA2 PE=1 SV=1	19632	5.68	50.14	1	1	0.52	17
H2TZ44	Uncharacterized protein OS=Takifugu rubripes GN=dzip1 PE=4 SV=1	78822	8.92	49.41	1	1	0.05	2.6
H3CGR2	Uncharacterized protein OS=Tetraodon nigroviridis PE=4 SV=1	53213	6.05	55.12	1	1	0.08	5.9
J3KSD8	Bleomycin hydrolase (Fragment) OS=Homo sapiens GN=BLMH PE=1 SV=8	30529	7.18	55.12	1	1	0.14	4.2
K7EPH2	Phenylalanine--tRNA ligase alpha subunit (Fragment) OS=Homo sapiens GN=FARSA PE=1 SV=8	43015	6.77	53.68	1	1	0.1	1.9
P02765	Alpha-2-HS-glycoprotein OS=Homo sapiens GN=AHSG PE=1 SV=1	40098	5.43	52.16	1	1	0.11	5.4
P02787	Serotransferrin OS=Homo sapiens GN=TF PE=1 SV=3	79294	6.81	53.68	1	1	0.11	2.7
P04406	Glyceraldehyde-3-phosphate dehydrogenase OS=Homo sapiens GN=GAPDH PE=1 SV=3	36201	8.57	50.86	1	1	0.77	24.8
P25311	Zinc-alpha-2-glycoprotein OS=Homo sapiens GN=AZGP1 PE=1 SV=2	34465	5.71	86.71	1	1	0.43	14.4
P29508	Serpin B3 OS=Homo sapiens GN=SERPINB3 PE=1 SV=2	44594	6.35	48.16	1	1	0.32	7.4
Q2A665	Glyceraldehyde-3-phosphate dehydrogenase OS=Salmo salar GN=gapdh PE=2 SV=1	36028	7.81	50.86	1	1	0.26	4.5
Q8N1N4	Keratin, type II cytoskeletal 78 OS=Homo sapiens GN=KRT78 PE=2 SV=2	57629	5.79	58.2	1	1	0.24	8.5
W5K8Y1	Uncharacterized protein OS=Astyanax mexicanus GN=MYOM2 (1 of many) PE=4 SV=1	158297	7.52	48.08	1	1	0.03	0.6

## Sheet: Peptide-List
Main Accession	Description	Peptide Sequence/Number of Peptides	Modifications	Peptide Score	m/z	Mr (Da)	z (Charge)	Delta (Da)	Samples
P04264	Keratin, type II cytoskeletal 1 OS=Homo sapiens GN=KRT1 PE=1 SV=6	48
		FSSCGGGGGSFGAGGGFGSR		176.02	883.37	1764.73	2	0	1V	2V	3V
		MSGECAPNVSVSVSTSHTTISGGGSR	Oxidation (M)	156.55	861.06	2580.16	3	0	1V	2V	3V
		NKLNDLEDALQQAKEDLAR		137.71	728.71	2183.12	3	0	1V	2V	3V
		QISNLQQSISDAEQR		122.93	858.94	1715.86	2	0.01	1V	2V	3V
		NKLNDLEDALQQAKEDLAR		120.46	546.79	2183.12	4	0			3V
		LNDLEDALQQAKEDLAR		119.56	648	1940.98	3	0	1V	2V	3V
		LDSELKNMQDMVEDYR	2 Oxidation (M)	116.92	673.3	2016.88	3	0	1V	2V	3V
		SKAEAESLYQSKYEELQITAGR		115.31	834.42	2500.25	3	0		2V
		NSKIEISELNR		111.08	434.91	1301.7	3	0	1V	2V	3V
		GGGGGGYGSGGSSYGSGGGSYGSGGGGGGGR		104.39	795.32	2382.95	3	0	1V	2V	3V
		NKLNDLEDALQQAK		102.45	800.42	1598.83	2	0	1V		3V
		SKAEAESLYQSK		101.34	670.84	1339.66	2	0		2V	3V
		TNAENEFVTIKK		100.65	465.25	1392.73	3	0	1V	2V	3V
		QISNLQQSISDAEQRGENALKDAK		99.49	661.59	2642.33	4	0	1V	2V	3V
		SLDLDSIIAEVK		97.4	651.86	1301.71	2	0	1V	2V	3V
		SLDLDSIIAEVKAQYEDIAQK		94.05	783.75	2348.23	3	0.02			3V
		SLNNQFASFIDKVR		93.96	546.96	1637.85	3	0	1V	2V	3V
		SLVNLGGSKSISISVAR		93.13	563.33	1686.96	3	0	1V
		THNLEPYFESFINNLR		92.75	665.33	1992.97	3	0	1V	2V	3V
		FLEQQNQVLQTK		92.44	738.4	1474.78	2	0	1V	2V	3V
		SLNNQFASFIDK		91.11	692.35	1382.69	2	0	1V	2V	3V
		QISNLQQSISDAEQR	Gln->pyro-Glu (N-term Q)	87.11	850.41	1698.81	2	0	1V	2V	3V
		WELLQQVDTSTR		86.49	738.38	1474.74	2	0	1V	2V	3V
		LNDLEDALQQAK		86.02	679.36	1356.7	2	0.01	1V	2V	3V
		FLEQQNQVLQTKWELLQQVDTSTR		85.54	978.18	2931.51	3	0	1V	2V	3V
		QISNLQQSISDAEQRGENALK		84.81	777.06	2328.17	3	0	1V		3V
		GSYGSGGSSYGSGGGSYGSGGGGGGHGSYGSGSSSGGYR		84.38	1104.77	3311.3	3	0			3V
		AEAESLYQSK		82.28	563.28	1124.54	2	0	1V		3V
		SKAEAESLYQSKYEELQITAGR		76.82	626.07	2500.23	4	-0.01			3V
		AEAESLYQSKYEELQITAGR		76.01	762.72	2285.12	3	0.01		2V	3V
		NKYEDEINKR		74.59	654.83	1307.65	2	0			3V
		LALDLEIATYR		72.01	639.36	1276.71	2	0	1V	2V	3V
		NKYEDEINKR		71.66	436.89	1307.64	3	0	1V
		TLLEGEESR		69.67	517.26	1032.51	2	0	1V	2V	3V
		TNAENEFVTIK		68.58	633.32	1264.63	2	0			3V
		IEISELNR		67.49	487.27	972.52	2	0	1V	2V	3V
		SKAEAESLYQSK		65.65	447.56	1339.66	3	0	1V
		YEELQITAGR		64.29	590.3	1178.59	2	0			3V
		NMQDMVEDYR	2 Oxidation (M)	64.04	666.77	1331.53	2	0.02	1V
		THNLEPYFESFINNLR		63.11	499.25	1992.97	4	0	1V
		LRSEIDNVKK		59.39	401.24	1200.69	3	0	1V		3V
		LLRDYQELMNTK	Oxidation (M)	56.29	513.93	1538.78	3	0.01	1V	2V
		AQYEDIAQK		54.86	533.26	1064.51	2	0	1V	2V	3V
		THNLEPYFESFINNLRR		53.76	538.28	2149.07	4	0	1V
		SLDLDSIIAEVKAQYEDIAQK		52.35	588.06	2348.21	4	0			3V
		SLVNLGGSK		47.78	437.75	873.49	2	0			3V
		SDQSRLDSELK		47.74	426.55	1276.63	3	0			3V
		DYQELMNTK	Oxidation (M)	47.24	579.26	1156.5	2	0			3V
P24378	Nucleoprotein OS=Viral hemorrhagic septicemia virus (strain 07-71) GN=N PE=2 SV=1^Atr|Q77AU4	43
		KLGELADTQGVGELQHFTADK		182.21	753.05	2256.14	3	0		2V	3V
		LGELADTQGVGELQHFTADK		164.17	710.36	2128.05	3	0	1V	2V	3V
		LGELADTQGVGELQHFTADKAAIR		142.75	847.44	2539.31	3	0.01	1V	2V	3V
		IGEDSTEVSDVIR		125.55	710.35	1418.69	2	0	1V	2V	3V
		KLGELADTQGVGELQHFTADK		124	565.04	2256.14	4	0	1V	2V
		YAVDSLEGLEGIKVTEK		121.57	617.66	1849.97	3	0	1V	2V	3V
		LNGTGMTMIGLFTQAANNLGIAPAK	2 Oxidation (M)	116.62	846.1	2535.28	3	0	1V	2V	3V
		EFAELVAEVLVDKYER		110.19	637.34	1908.99	3	0	1V	2V	3V
		LLEDLCMESLVESAR	Oxidation (M)	108.71	594.29	1779.84	3	0	1V
		LLEDLCMESLVESAR	Oxidation (M)	108.28	890.93	1779.84	2	0.01		2V	3V
		VLTDMGFKVTQAVR	Oxidation (M)	108.25	527.62	1579.84	3	0	1V
		LNGTGMTMIGLFTQAANNLGIAPAK		106.36	835.44	2503.3	3	0.01		2V	3V
		SYGLNDNSKISYILSQISGK		105.12	729.72	2186.13	3	0	1V
		LLEDLCMESLVESAR		104.88	882.93	1763.85	2	0	1V	2V	3V
		LNGTGMTMIGLFTQAANNLGIAPAK	Oxidation (M)	101.22	840.77	2519.29	3	0.01	1V	2V	3V
		AAFSGLNDVRIDPTGGEGR		99.89	644.66	1930.95	3	0	1V	2V	3V
		YAVDSLEGLEGIK		96.16	697.37	1392.72	2	0	1V	2V	3V
		ELALTVNDDNLMEIVK	Oxidation (M)	92.73	916.97	1831.93	2	0.01	1V	2V	3V
		ALYAFILTEIADPTTQSR		91.35	670.69	2009.05	3	0	1V	2V	3V
		IGEDSTEVSDVIREAAR		88.34	616.31	1845.91	3	0	1V
		ALYAFILTEIADPTTQSR		87.38	1005.53	2009.05	2	0	1V	2V	3V
		QVSEAKSIQER		86.29	425.56	1273.66	3	0	1V
		AAFSGLNDVR		79.4	525.27	1048.53	2	0	1V	2V	3V
		ITKALYAFILTEIADPTTQSR		78.6	784.77	2351.28	3	0.01	1V
		FREFAELVAEVLVDKYER		78.08	554.05	2212.16	4	0	1V	2V	3V
		GTLMTCSLLTK	Oxidation (M)	75.58	620.82	1239.62	2	0	1V	2V	3V
		ISYILSQISGK		75.11	604.85	1207.68	2	0	1V	2V	3V
		ELALTVNDDNLMEIVK		72.43	909.47	1816.93	2	1	1V	2V
		KLGELADTQGVGELQHFTADKAAIR		69.96	667.86	2667.4	4	0	1V
		YAVDSLEGLEGIKVTEKFR		68.01	539.29	2153.13	4	0	1V
		IDPTGGEGR		66.03	451.22	900.43	2	0	1V	2V
		VLVPGEVELIVYVGEFGEEDRK		64.76	826.1	2475.29	3	0		2V	3V
		ATSIEAGIMMPMR	3 Oxidation (M)	63.83	728.34	1454.66	2	0	1V	2V	3V
		SYGLNDNSK		61.5	499.23	996.45	2	0	1V	2V	3V
		GTLMTCSLLTK		61.24	612.82	1223.63	2	0	1V	2V	3V
		VLTDMGFK	Oxidation (M)	59.83	463.74	925.46	2	0	1V	2V	3V
		YAIMMSR	Oxidation (M)	53.7	444.21	886.41	2	0		2V	3V
		LLEDLCMESLVESARR	Oxidation (M)	52.9	646.32	1935.93	3	0	1V		3V
		MLGESYYK		51.73	495.74	989.46	2	0.01	1V	2V
		EFAELVAEVLVDK		50.5	731.4	1460.78	2	0.01			3V
		ISYILSQISGKYAVDSLEGLEGIK		50.21	861.8	2582.39	3	0	1V
		MLGESYYK	Oxidation (M)	49.26	503.73	1005.45	2	0	1V	2V	3V
		LLEDLCMESLVESARR		47.93	640.99	1919.95	3	0.01		2V
P02769	Serum albumin (Laboratory-Cont) OS=Bos taurus GN=ALB PE=1 SV=4^Asw|P02769	37
		LGEYGFQNALIVR		129.08	740.4	1478.79	2	0	1V	2V	3V
		GLVLIAFSQYLQQCPFDEHVK		118.09	831.43	2491.26	3	0			3V
		KVPQVSTPTLVEVSR		113.9	547.32	1638.93	3	0	1V	2V	3V
		DAIPENLPPLTADFAEDKDVCK		111.84	820.07	2457.17	3	0	1V	2V	3V
		VPQVSTPTLVEVSR		110.54	756.43	1510.84	2	0	1V	2V	3V
		LFTFHADICTLPDTEK		106.79	636.65	1906.94	3	0.02		2V	3V
		MPCTEDYLSLILNR	Oxidation (M)	104.23	870.92	1739.82	2	0		2V	3V
		SHCIAEVEKDAIPENLPPLTADFAEDKDVCK		100.26	878.67	3510.66	4	-0.01	1V
		CCAADDKEACFAVEGPK		94.16	643.27	1926.79	3	0		2V	3V
		KQTALVELLK		91.71	571.86	1141.71	2	0		2V	3V
		LGEYGFQNALIVR		84.8	493.94	1478.79	3	0.01		2V
		LKPDPNTLCDEFK		83.95	526.26	1575.76	3	0	1V		3V
		YICDNQDTISSK		82	722.32	1442.63	2	-0.01		2V	3V
		TVMENFVAFVDK	Oxidation (M)	81.66	708.35	1414.68	2	0	1V	2V	3V
		DAFLGSFLYEYSR		81.29	784.38	1566.74	2	0.01	1V	2V	3V
		RHPEYAVSVLLR		78.81	480.61	1438.81	3	0.01		2V
		FKDLGEEHFK		75.54	417.21	1248.62	3	0	1V	2V	3V
		LKECCDKPLLEK		74.64	511.6	1531.77	3	0		2V	3V
		QTALVELLK		72.18	507.81	1013.61	2	0	1V	2V	3V
		RHPYFYAPELLYYANK		70.75	682.35	2044.02	3	0	1V	2V	3V
		LVNELTEFAK		70.58	582.32	1162.63	2	0	1V	2V	3V
		TCVADESHAGCEK		69.39	488.53	1462.58	3	0	1V
		HLVDEPQNLIK		67.69	435.91	1304.71	3	0	1V
		SLHTLFGDELCK		67.22	473.9	1418.69	3	0	1V	2V
		QTALVELLK	Gln->pyro-Glu (N-term Q)	66.13	499.3	996.59	2	0	1V	2V	3V
		AEFVEVTKLVTDLTK		64.84	564.99	1691.94	3	0	1V
		SLHTLFGDELCK		62.12	710.35	1418.69	2	0			3V
		HPYFYAPELLYYANK		60.68	630.32	1887.92	3	0		2V	3V
		CCTESLVNR		58.1	569.75	1137.49	2	0	1V	2V	3V
		YNGVFQECCQAEDK		57.95	874.35	1746.69	2	0		2V
		MPCTEDYLSLILNR	Oxidation (M)	56.68	580.95	1739.83	3	0	1V
		RHPYFYAPELLYYANK		56.01	512.01	2044.02	4	0	1V
		AEFVEVTK		55.05	461.75	921.48	2	0		2V	3V
		HPEYAVSVLLR		50.78	642.36	1282.7	2	0	1V		3V
		GACLLPK		50.52	379.71	757.42	2	0	1V	2V	3V
		EYEATLEECCAK		49.58	751.81	1501.61	2	0		2V
		LVTDLTK		49.14	395.24	788.46	2	0	1V		3V
P13645	Keratin, type I cytoskeletal 10 OS=Homo sapiens GN=KRT10 PE=1 SV=6	35
		VTMQNLNDRLASYLDKVR	Oxidation (M)	141.6	538.79	2151.11	4	0	1V
		ADLEMQIESLTEELAYLKK	Oxidation (M)	138.19	747.38	2239.13	3	0	1V	2V	3V
		GSSGGGCFGGSSGGYGGLGGFGGGSFR		137.26	1171.99	2341.97	2	-0.01		2V
		AETECQNTEYQQLLDIK		135.15	1041.99	2081.96	2	0.01	1V	2V	3V
		GSLGGGFSSGGFSGGSFSR		132.6	854.39	1706.77	2	0	1V	2V	3V
		ELTTEIDNNIEQISSYK		120.57	998.98	1995.95	2	-0.01		2V	3V
		TIDDLKNQILNLTTDNANILLQIDNAR		110.4	1018.22	3051.63	3	0.01			3V
		ADLEMQIESLTEELAYLKK		110.1	742.05	2223.14	3	0.01		2V	3V
		SKELTTEIDNNIEQISSYK		105.81	738.04	2211.09	3	0	1V	2V
		QSLEASLAETEGR		103.57	695.84	1389.67	2	0	1V	2V	3V
		SLLEGEGSSGGGGR		99.59	631.8	1261.59	2	0	1V	2V	3V
		GSSGGGCFGGSSGGYGGLGGFGGGSFR		96.92	781.67	2341.98	3	0	1V		3V
		SKELTTEIDNNIEQISSYK		94.67	1106.54	2211.08	2	-0.02			3V
		QSVEADINGLR		79.54	601.31	1200.61	2	0	1V	2V	3V
		LENEIQTYR		78.41	583.3	1164.58	2	0		2V	3V
		IRLENEIQTYR		77.73	717.89	1433.76	2	0	1V	2V	3V
		SQYEQLAEQNRK		76.78	498.58	1492.73	3	0	1V	2V	3V
		ALEESNYELEGK		74.59	691.33	1380.64	2	0	1V		3V
		LKYENEVALR		73.27	412.56	1234.66	3	0.99	1V	2V	3V
		NVQALEIELQSQLALK		73.06	899.01	1796.01	2	0		2V
		VLDELTLTK		72.53	516.3	1030.59	2	0		2V	3V
		ELTTEIDNNIEQISSYKSEITELRR		71.94	746.13	2980.5	4	0			3V
		QSVEADINGLRR		69.06	453.24	1356.71	3	0	1V	2V
		NVSTGDVNVEMNAAPGVDLTQLLNNMR	2 Oxidation (M)	67.77	726.85	2903.38	4	0			3V
		SQYEQLAEQNR		67.7	683.33	1364.64	2	0	1V	2V	3V
		VTMQNLNDR		67.12	545.77	1089.52	2	0			3V
		ADLEMQIESLTEELAYLKK	Oxidation (M)	63.45	560.79	2239.13	4	0			3V
		LASYLDKVR		60.89	355.54	1063.61	3	0.01	1V	2V	3V
		NVSTGDVNVEMNAAPGVDLTQLLNNMR	2 Oxidation (M)	59.48	968.8	2903.37	3	-0.01		2V
		SEITELR		57.63	424.23	846.45	2	0	1V	2V
		NVQALEIELQSQLALK		57.24	599.68	1796.01	3	0	1V		3V
		VTMQNLNDRLASYLDKVR	Oxidation (M)	56.41	718.04	2151.11	3	0	1V
		QSLEASLAETEGR	Gln->pyro-Glu (N-term Q)	53.36	687.33	1372.65	2	0.01	1V
		LAADDFR		52.01	404.2	806.39	2	0	1V	2V	3V
		YENEVALR		50.06	497.25	992.49	2	0	1V
P35527	Keratin, type I cytoskeletal 9 OS=Homo sapiens GN=KRT9 PE=1 SV=3	35
		GGSGGSYGGGGSGGGYGGGSGSR		184.25	896.37	1790.72	2	0	1V	2V	3V
		GGSGGSHGGGSGFGGESGGSYGGGEEASGSGGGYGGGSGK		178.05	1075.1	3222.29	3	0.02	1V	2V	3V
		NYSPYYNTIDDLKDQIVDLTVGNNK		177.39	968.14	2901.41	3	0.01		2V	3V
		VQALEEANNDLENKIQDWYDKK		170.05	666.58	2662.29	4	0.01			3V
		DIENQYETQITQIEHEVSSSGQEVQSSAK		144.05	1088.85	3263.52	3	0.01		2V	3V
		EIETYHNLLEGGQEDFESSGAGK		143.14	837.38	2509.12	3	0	1V	2V	3V
		GGGGSFGYSYGGGSGGGFSASSLGGGFGGGSR		135.84	902.39	2704.16	3	0	1V	2V	3V
		YCGQLQMIQEQISNLEAQITDVR	Oxidation (M)	128.45	918.45	2752.32	3	0.01		2V	3V
		SGGGGGGGLGSGGSIR		122.21	616.8	1231.59	2	0	1V	2V	3V
		HGVQELEIELQSQLSK		121.03	919.48	1836.94	2	-0.01		2V
		KDIENQYETQITQIEHEVSSSGQEVQSSAK		118.78	848.91	3391.6	4	0	1V	2V
		HGVQELEIELQSQLSK		115.77	613.33	1836.96	3	0	1V		3V
		HGVQELEIELQSQLSKKAALEK		114.63	620.34	2477.35	4	0			3V
		HGVQELEIELQSQLSKK		99.91	656.02	1965.05	3	0	1V		3V
		VQALEEANNDLENK		94.12	793.89	1585.76	2	0		2V	3V
		IKFEMEQNLR	Oxidation (M)	88.76	441.9	1322.67	3	0	1V	2V	3V
		QEIECQNQEYSLLLSIK		88.76	1048.02	2094.03	2	0			3V
		DIENQYETQITQIEHEVSSSGQEVQSSAK		83.06	816.89	3263.51	4	0.01			3V
		FSSSSGYGGGSSR		82.16	618.27	1234.52	2	0	1V		3V
		QGVDADINGLR		76.11	579.3	1156.58	2	0	1V	2V	3V
		TLLDIDNTR		65.73	530.79	1059.56	2	0	1V	2V	3V
		VQALEEANNDLENK		65.68	529.59	1585.76	3	0		2V
		QVLDNLTMEK	Oxidation (M)	63.16	603.81	1205.6	2	0	1V
		LEKEIETYHNLLEGGQEDFESSGAGK		63.03	720.84	2879.35	4	0			3V
		SDLEMQYETLQEELMALKK	2 Oxidation (M)	62.77	777.71	2330.11	3	0			3V
		QGVDADINGLR	Gln->pyro-Glu (N-term Q)	62.58	570.79	1139.56	2	0	1V
		LASYLDKVQALEEANNDLENKIQDWYDK		62.39	832.16	3324.62	4	0.01			3V
		QEYEQLIAK		61.92	561.3	1120.58	2	0.01	1V
		TLNDMRQEYEQLIAK	Oxidation (M)	61.23	623.31	1866.92	3	0.01	1V
		IQDWYDK		54.62	484.23	966.45	2	0		2V
		STMQELNSR		54.24	533.26	1064.52	2	0.02		2V
		HGVQELEIELQSQLSKK		54.14	492.27	1965.05	4	0	1V
		QEIECQNQEYSLLLSIK		53.4	699.01	2094.02	3	-0.01			3V
		MTLDDFR	Oxidation (M)	52.11	457.21	912.4	2	0	1V	2V	3V
		SDLEMQYETLQEELMALK	2 Oxidation (M)	47.98	735.01	2202.01	3	0			3V
P35908	Keratin, type II cytoskeletal 2 epidermal OS=Homo sapiens GN=KRT2 PE=1 SV=2	29
		NKLNDLEEALQQAKEDLAR		151.35	733.39	2197.14	3	0	1V	2V
		GGGFGGGSSFGGGSGFSGGGFGGGGFGGGR		149.18	1200.02	2398.03	2	0.01		2V	3V
		LNDLEEALQQAKEDLAR		143.48	652.67	1954.99	3	0	1V
		TSQNSELNNMQDLVEDYKK	Oxidation (M)	129.53	758.02	2271.02	3	-0.01		2V	3V
		NKLNDLEEALQQAKEDLAR		114.12	550.29	2197.13	4	0			3V
		GSSSGGGYSSGSSSYGSGGR		108.46	870.86	1739.7	2	0		2V	3V
		TAAENDFVTLKK		108.46	446.24	1335.71	3	0	1V	2V	3V
		SISISVAGGGGGFGAAGGFGGR		106.09	919.96	1837.9	2	-0.01	1V	2V	3V
		VDLLNQEIEFLK		102.63	730.9	1459.79	2	0	1V		3V
		GGSGGGGSISGGGYGSGGGSGGR		99.95	871.38	1740.74	2	0		2V	3V
		NVQDAIADAEQRGEHALKDAR		99.94	577.54	2306.14	4	0.01	1V	2V	3V
		HGGGGGGFGGGGFGSR		92.55	660.8	1319.58	2	0.01	1V		3V
		NVQDAIADAEQR		89.7	665.32	1328.63	2	0	1V	2V	3V
		GFSSGSAVVSGGSR		83.87	627.81	1253.6	2	0	1V	2V	3V
		NKLNDLEEALQQAK		82.88	538.62	1612.84	3	0			3V
		GGGFGGGSSFGGGSGFSGGGFGGGGFGGGR		80.6	800.34	2398.01	3	0	1V
		VLYDAEISQIHQSVTDTNVILSMDNSR	Oxidation (M)	79.43	1022.5	3064.47	3	0.99	1V	2V
		NLDLDSIIAEVK		76.85	665.37	1328.72	2	0	1V	2V	3V
		YEELQVTVGR		72.16	597.31	1192.61	2	0	1V	2V
		LNDLEEALQQAK		70.17	686.36	1370.71	2	0	1V	2V	3V
		SLVGLGGTK		69.22	416.25	830.49	2	0		2V	3V
		MSGDLSSNVTVSVTSSTISSNVASK	Oxidation (M)	63.96	1237.59	2473.17	2	-0.02			3V
		STSSFSCLSR		59.94	566.26	1130.5	2	0			3V
		LQGEIAHVK		56.5	497.79	993.56	2	0			3V
		AQYEEIAQR		56.19	554.28	1106.54	2	0	1V		3V
		YLDGLTAER		55.04	519.27	1036.52	2	0		2V	3V
		FASFIDKVR		53.63	541.8	1081.59	2	0	1V		3V
		LLRDYQELMNVK	Oxidation (M)	49.98	513.27	1536.8	3	0	1V
		VDPEIQNVK		49.3	521.28	1040.55	2	0		2V
C1BEM6	Hemoglobin subunit beta OS=Oncorhynchus mykiss GN=HBB PE=2 SV=1	22
		AVQNLDDIKNTYTALSVMHSEK	Oxidation (M)	150.4	624.06	2492.22	4	0	1V	2V	3V
		AVQNLDDIKNTYTALSVMHSEK		133.9	826.41	2476.22	3	0	1V	2V	3V
		LGPAVFNADTQEAFQK		122.95	868.44	1734.86	2	0	1V	2V	3V
		HFSTFGNLSTPAAIMGNPAVAK	Oxidation (M)	119.61	749.71	2246.12	3	0	1V	2V
		AVQNLDDIKNTYTALSVMHSEK		116.55	620.06	2476.23	4	0	1V		3V
		HFSTFGNLSTPAAIMGNPAVAK	Oxidation (M)	112.06	1124.07	2246.12	2	0	1V	2V	3V
		ISVDEIGPQALAR		107.95	456.92	1367.74	3	0	1V
		SAIVGLWGKISVDEIGPQALAR		103.49	760.76	2279.27	3	0	1V
		AVQNLDDIKNTYTALSVMHSEKLHVDPDNFR	Oxidation (M)	98.48	718.16	3585.75	5	0	1V
		AVQNLDDIKNTYTALSVMHSEKLHVDPDNFR	Oxidation (M)	98.35	598.63	3585.75	6	0	1V
		ISVDEIGPQALAR		93.47	684.88	1367.74	2	0	1V	2V	3V
		FLAVVVSALGR		87.81	566.35	1130.68	2	0	1V	2V	3V
		NTYTALSVMHSEK		76.86	494.24	1479.7	3	0	1V
		NTYTALSVMHSEK	Oxidation (M)	74.03	748.85	1495.69	2	-0.01	1V	2V
		LLADCITVCVAAK		71.69	717.38	1432.74	2	0	1V		3V
		LLIVSPWTQR		71.58	606.86	1211.7	2	0	1V	2V	3V
		HFSTFGNLSTPAAIMGNPAVAK	Oxidation (M)	70.96	562.54	2246.11	4	0	1V
		SAIVGLWGK		67.46	465.77	929.53	2	0	1V	2V	3V
		VDWTDAERSAIVGLWGK		63.8	634.99	1901.96	3	0	1V
		LHVDPDNFR		58.31	556.78	1111.54	2	0	1V	2V	3V
		AVQNLDDIK		54.81	508.28	1014.54	2	0	1V	2V	3V
		VDWTDAER		48.33	496.23	990.44	2	0		2V
A0A060YEC0	Uncharacterized protein OS=Oncorhynchus mykiss GN=GSONMT00016594001 PE=3 SV=1	12
		STISAVWGKVDINEVGPLALGR		116.09	761.42	2281.24	3	0	1V	2V	3V
		FGASFTPEIQATWQK		114.45	855.93	1709.84	2	0	1V	2V
		YFGSFGDVSTPAAIMGNPK	Oxidation (M)	107.8	987.97	1973.92	2	0	1V	2V
		VDINEVGPLALGR		102.97	676.88	1351.75	2	0	1V	2V	3V
		VLADVLTIVVAAK		87.59	656.42	1310.82	2	0	1V	2V
		SLSETHANKLFVDPENFR		87.16	526.77	2103.05	4	0.01	1V
		STISAVWGK		67.11	474.76	947.51	2	0	1V	2V	3V
		NMGNILATYK		66.23	562.79	1123.56	2	-0.01	1V	2V	3V
		NMGNILATYK	Oxidation (M)	60.66	571.29	1140.56	2	1	1V
		LFVDPENFR		52.8	568.79	1135.57	2	0	1V		3V
		VLIVYPWTQR		52.8	637.87	1273.72	2	0	1V	2V	3V
		VVCGALDK		52.47	431.23	860.44	2	0	1V		3V
A0A0P7TS35	Histone H4 (Fragment) OS=Scleropages formosus GN=Z043_126092 PE=3 SV=1	10
		TVTAMDVVYALK	Oxidation (M)	115.54	663.85	1325.69	2	0	1V	2V	3V
		TVTAMDVVYALKR	Oxidation (M)	106.99	494.94	1481.8	3	0	1V
		QVHPDTGISSK		97.56	390.2	1167.59	3	0	1V
		TVTAMDVVYALKR		82.11	489.61	1465.8	3	0		2V
		ISGLIYEETR		79.2	590.81	1179.61	2	0	1V	2V	3V
		VFLENVIRDAVTYTEHAK		77.1	527.03	2104.09	4	0	1V	2V
		DNIQGITKPAIR		74.34	442.59	1324.75	3	0	1V	2V	3V
		KTVTAMDVVYALKR	Oxidation (M)	62.64	537.64	1609.9	3	0.01	1V
		VFLENVIR		60.67	495.29	988.57	2	0	1V	2V	3V
		TVTAMDVVYALKR	Oxidation (M)	48.39	741.91	1481.8	2	0			3V
P00761	Trypsin (Laboratory-Cont) OS=Sus scrofa PE=1 SV=1^Asw|P00761	10
		LGEHNIDVLEGNEQFINAAK		121.61	1106.06	2210.1	2	0.01	1V	2V
		IITHPNFNGNTLDNDIMLIK	Oxidation (M)	113.1	767.06	2298.17	3	0.01	1V	2V	3V
		LGEHNIDVLEGNEQFINAAK		101.98	737.71	2210.1	3	0	1V	2V	3V
		LSSPATLNSR		81.51	523.29	1044.56	2	0	1V	2V	3V
		IITHPNFNGNTLDNDIMLIK		73.68	761.73	2282.18	3	0.01	1V	2V	3V
		VCNYVNWIQQTIAAN		70.41	897.43	1792.85	2	0	1V	2V
		VATVSLPR		69.41	421.76	841.5	2	0	1V	2V	3V
		LGEHNIDVLEGNEQFINAAK		65.47	553.53	2210.1	4	0	1V
		IITHPNFNGNTLDNDIMLIK	Oxidation (M)	56.01	575.55	2298.17	4	0		2V
		VCNYVNWIQQTIAAN		51.36	598.96	1793.86	3	1			3V
A0A0B5E7Z4	Beta-actin OS=Tachysurus fulvidraco PE=2 SV=1	9
		SYELPDGQVITIGNER		103.3	895.95	1789.89	2	0	1V	2V	3V
		QEYDESGPSIVHR		97.49	506.24	1515.69	3	0	1V	2V
		VAPEEHPVLLTEAPLNPK		90.58	652.03	1953.06	3	0	1V	2V	3V
		DLYANTVLSGGTTMYPGIADR	Oxidation (M)	73.51	744.36	2230.06	3	0	1V	2V
		TTGIVMDSGDGVTHTVPIYEGYALPHAILR	Oxidation (M)	71.44	800.66	3198.6	4	0	1V	2V
		AGFAGDDAPR		70.57	488.73	975.44	2	0	1V	2V
		AVFPSIVGRPR		62.81	400.24	1197.7	3	0	1V
		GYSFTTTAER		56.65	566.77	1131.52	2	0	1V	2V	3V
		EITSLAPSTMK	Oxidation (M)	48.18	597.31	1192.6	2	0	1V
P02533	Keratin, type I cytoskeletal 14 OS=Homo sapiens GN=KRT14 PE=1 SV=4	9
		APSTYGGGLSVSSSR		96.23	713.35	1424.69	2	0	1V	2V	3V
		EVATNSELVQSGK		90.33	681.35	1360.68	2	-0.01	1V	2V	3V
		ILTATVDNANVLLQIDNAR		78.47	685.38	2053.12	3	0			3V
		ALEEANADLEVK		75.6	651.33	1300.65	2	0	1V		3V
		ASLENSLEETK		73.64	610.8	1219.59	2	0		2V	3V
		VLDELTLAR		62.01	515.3	1028.59	2	0	1V	2V	3V
		ISSVLAGGSCR		54.88	553.79	1105.56	2	0	1V
		GQVGGDVNVEMDAAPGVDLSR	Oxidation (M)	52.18	1051.48	2100.95	2	-0.03		2V
		DAEEWFFTK		49.73	586.77	1171.52	2	0	1V		3V
P13647	Keratin, type II cytoskeletal 5 OS=Homo sapiens GN=KRT5 PE=1 SV=3	9
		ISISTSGGSFR		73.1	556.29	1110.56	2	0	1V	2V	3V
		QNLEPLFEQYINNLR		67.78	631	1889.97	3	0.01		2V	3V
		LAELEEALQK		64.22	572.31	1142.61	2	-0.01	1V
		YEELQQTAGR		63.95	597.79	1193.57	2	0		2V	3V
		AQYEEIANR		58.95	547.26	1092.51	2	-0.01	1V	2V
		QLDSIVGER		54.4	508.77	1015.53	2	0.01			3V
		WTLLQEQGTK		49.17	602.32	1202.63	2	0	1V		3V
		NKLAELEEALQK		48.12	693.38	1384.75	2	-0.01			3V
		SLYNLGGSK		47.82	469.75	937.49	2	0		2V
Q5GAX6	Histone H3a (Fragment) OS=Pterophyllum scalare PE=3 SV=1	8
		EIAQDFKTDLR	Glu->pyro-Glu (N-term E)	74.9	439.9	1316.68	3	0.01	1V	2V
		EIAQDFKTDLR		70.46	668.35	1334.68	2	0	1V		3V
		QIAQDFKTDLR		66.52	445.9	1334.69	3	0.99	1V	2V
		STELLIR		54.87	416.25	830.49	2	0	1V	2V	3V
		YRPGTVALR		52.87	516.8	1031.59	2	0			3V
		EIAQDFKTDLR	Glu->pyro-Glu (N-term E)	52.6	659.34	1316.67	2	0	1V
		EIAQDFKTDLR		50.73	445.9	1334.68	3	0			3V
		QIAQDFK		49.25	425.72	849.43	2	0.99	1V		3V
C1BG68	Hemoglobin subunit alpha-1 OS=Oncorhynchus mykiss GN=HBA1 PE=2 SV=1	7
		ISGKADVVGAEALGR		121.94	481.6	1441.79	3	0	1V
		AVGLMDDLVGGMSALSDLHAFNLR	2 Oxidation (M)	95.31	845.42	2533.24	3	0.01	1V	2V	3V
		ADVVGAEALGR		90.41	529.29	1056.56	2	0	1V	2V	3V
		TYFSHWADLSPGSGPVK		86.09	616.97	1847.88	3	0	1V	2V	3V
		TYFSHWADLSPGSGPVKK		70.9	659.67	1975.98	3	0	1V
		FLAAVSAALADK		62.97	588.83	1175.65	2	0	1V
		HGGIIMGAIGK	Oxidation (M)	53.14	535.29	1068.57	2	0	1V
C1BG02	Hemoglobin subunit alpha-4 OS=Oncorhynchus mykiss GN=HBA4 PE=2 SV=1	6
		ILPKTDEIGDQALSR		120.2	552.64	1654.89	3	0	1V
		TDEIGDQALSR		100.91	602.79	1203.57	2	0	1V	2V	3V
		SLSAKDKANVK	Acetyl (Protein N-term)	87.98	401.56	1201.67	3	0	1V
		FLQQLALGLAEK		87.5	665.89	1329.77	2	0	1V	2V	3V
		AYFSHWASVAPGSAPVK		68.93	592.3	1773.89	3	0	1V	2V	3V
		AYFSHWASVAPGSAPVKK		57.53	635	1901.98	3	0	1V
P02768	Serum albumin OS=Homo sapiens GN=ALB PE=1 SV=2	6
		QTALVELVK		77.73	500.81	999.6	2	0	1V		3V
		VFDEFKPLVEEPQNLIK		73.58	682.37	2044.09	3	0	1V	2V	3V
		SLHTLFGDK		55.54	509.77	1017.53	2	1	1V		3V
		DVFLGMFLYEYAR	Oxidation (M)	51.42	820.4	1638.78	2	0.01			3V
		AVMDDFAAFVEK	Oxidation (M)	49.78	679.83	1357.64	2	0.02	1V		3V
		LVAASQAALGL		48.85	507.3	1012.59	2	0			3V
Q7T2K6	Carbonic anhydrase 2 OS=Oncorhynchus mykiss GN=GSONMT00073683001 PE=2 SV=1	5
		QSPIDIIPGQTSYDSTLKPLK		131.89	767.75	2300.22	3	0	1V		3V
		QTTFSNFDAK		78.74	579.78	1157.54	2	0		2V
		QSPIDIIPGQTSYDSTLKPLK	Gln->pyro-Glu (N-term Q)	69.67	762.07	2283.2	3	0	1V	2V
		YPSFGEAASEPDGLAVVGVFLK		64.67	751.72	2252.14	3	0	1V	2V	3V
		VLDALGAIK		54.35	450.29	898.56	2	0.01	1V	2V
A0A060XZ25	Uncharacterized protein OS=Oncorhynchus mykiss GN=GSONMT00052301001 PE=3 SV=1	4
		VLADVLTIVIAAK		90.75	663.43	1324.84	2	0	1V
		FGAAFTPEIQATWQK		86.54	847.93	1693.85	2	0	1V	2V	3V
		YFGSFGDVSTAAAIMGNPK	Oxidation (M)	80.41	974.96	1947.91	2	0.01	1V	2V	3V
		VVVAAMSSR	Oxidation (M)	50.15	468.25	934.49	2	0	1V
P14527	Hemoglobin subunit alpha-4 OS=Oncorhynchus mykiss GN=hba4 PE=1 SV=1	4
		ILPKSDEIGEQALSR		116.41	552.64	1654.89	3	0	1V
		SDEIGEQALSR		112.8	602.79	1203.57	2	0	1V	2V	3V
		FLQQLALALAEK		60.96	672.88	1343.75	2	-0.03		2V	3V
		SDEIGEQALSR		54.98	402.2	1203.57	3	0	1V
X1WG17	Histone H2B (Fragment) OS=Danio rerio GN=hist1h2ba PE=1 SV=1	4
		AMGIMNSFVNDIFER	2 Oxidation (M)	88.33	888.41	1774.81	2	0	1V	2V	3V
		AMGIMNSFVNDIFER	Oxidation (M)	65.43	880.42	1758.83	2	0.03	1V
		AMGIMNSFVNDIFER	2 Oxidation (M)	49.92	592.61	1774.8	3	0	1V
		EIQTAVR		49.18	408.73	815.44	2	-0.01	1V
A0A060XSJ5	Uncharacterized protein OS=Oncorhynchus mykiss GN=GSONMT00009493001 PE=3 SV=1	3
		AYFSHWASVAPGSPPVKK		69.53	483.01	1927.99	4	0	1V
		AYFSHWASVAPGSPPVK		65.39	600.97	1799.9	3	0	1V	2V	3V
		MLVVYPQTKAYFSHWASVAPGSPPVK	Oxidation (M)	49.99	719.87	2875.47	4	0	1V
A0A060YP37	Uncharacterized protein OS=Oncorhynchus mykiss GN=GSONMT00058133001 PE=3 SV=1	3
		STISAVWGKVDINEIGPLALGR		84.85	766.09	2295.25	3	0	1V
		VDINEIGPLALGR		74.68	683.89	1365.76	2	0	1V
		LFVDPDNFR		57.16	561.78	1121.55	2	0	1V	2V	3V
A0A0A0MS08	Ig gamma-1 chain C region (Fragment) OS=Homo sapiens GN=IGHG1 PE=1 SV=1	3
		VVSVLTVLHQDWLNGK		80.1	603.67	1808	3	1		2V
		TTPPVLDSDGSFFLYSK		75.29	937.46	1872.91	2	0		2V
		GPSVFPLAPSSK		68.6	593.83	1185.64	2	0	1V	2V
A0A0A0MS14	Immunoglobulin heavy variable 1-45 OS=Homo sapiens GN=IGHV1-45 PE=3 SV=1	3
		SEDTAMYYCAR		77.48	683.77	1365.53	2	0	1V	2V	3V
		SEDTAMYYCAR	Oxidation (M)	71.56	691.77	1381.53	2	0	1V	2V	3V
		SEDTAMYYCAR	Oxidation (M)	65.2	461.52	1381.53	3	0	1V	2V
A0A0G2JPR0	Complement C4-A OS=Homo sapiens GN=C4A PE=1 SV=1	3
		ASAGLLGAHAAAITAYALTLTK		68.57	695.73	2084.17	3	0		2V
		DSSTWLTAFVLK		65.51	684.37	1366.72	2	0.01	1V	2V	3V
		DHAVDLIQK		49.05	519.78	1037.55	2	0	1V
E0WER5	Matrix protein OS=Viral hemorrhagic septicemia virus GN=m PE=4 SV=1	3
		HGSVTYYGPFIFADDHVGGK		83.01	723.01	2166.02	3	0	1V	2V	3V
		TLITSFK		57.26	405.24	808.47	2	0		2V
		SGTSSVRPW		49.62	488.75	975.48	2	0	1V
E9PFZ2	Ceruloplasmin OS=Homo sapiens GN=CP PE=1 SV=1	3
		DIASGLIGPLIICK		91.56	735.42	1468.83	2	0	1V	2V	3V
		DLYSGLIGPLIVCR		53.73	788.43	1574.85	2	0	1V
		VDKDNEDFQESNR		50.73	532.57	1594.7	3	0.02	1V
P02538	Keratin, type II cytoskeletal 6A OS=Homo sapiens GN=KRT6A PE=1 SV=3	3
		TAAENEFVTLKK		90.66	450.91	1349.71	3	-0.01			3V
		ADTLTDEINFLR		89.05	704.36	1406.7	2	0	1V	2V	3V
		SLYGLGGSK		53.34	441.74	881.46	2	0.99			3V
P06350	Histone H1 OS=Oncorhynchus mykiss PE=1 SV=2	3
		SGVSLAALKK		66.03	487.3	972.58	2	-0.02	1V	2V	3V
		AGPSVGELIVK		60.68	535.31	1068.62	2	0	1V		3V
		AEVAPAPAAAAPAK		54.72	617.84	1233.66	2	-0.01	1V
Q2TS51	Elongation factor 1-alpha OS=Pimephales promelas PE=2 SV=1	3
		IGGIGTVPVGR		66.44	513.31	1024.6	2	-0.01	1V	2V	3V
		EGNASGVTLLDALDAILPPSRPTDKPLR		55.24	729.9	2915.57	4	0			3V
		YYVTIIDAPGHR		48.27	702.87	1403.72	2	0			3V
Q6R4A2	Cytoplasmic carbonic anhydrase OS=Oncorhynchus mykiss GN=CA2 PE=2 SV=1	3
		QTSFENFDPTILLPK		88.2	875.46	1748.91	2	0.01	1V	2V	3V
		QSPIDIVPGEAAFDAALK		72.45	921.49	1840.96	2	0	1V	2V	3V
		VLDAFDAIK		59.5	496.28	990.54	2	0	1V	2V	3V
A0A060WK77	Tubulin beta chain OS=Oncorhynchus mykiss GN=GSONMT00072337001 PE=3 SV=1	2
		LAVNMVPFPR	Oxidation (M)	74.22	580.32	1158.62	2	0	1V	2V	3V
		ALTVPELTQQVFDAK		52.9	830.45	1658.88	2	-0.01			3V
A0A060XSB4	Uncharacterized protein OS=Oncorhynchus mykiss GN=GSONMT00052297001 PE=3 SV=1	2
		SDEIGDQALSR		112.99	595.79	1189.56	2	0	1V	2V	3V
		ILPKSDEIGDQALSR		75.66	821.44	1640.87	2	0	1V
A0A060XSW0	Uncharacterized protein OS=Oncorhynchus mykiss GN=GSONMT00052298001 PE=3 SV=1	2
		LGPVVFSADIQEAFQK		112.12	874.97	1747.92	2	0.01	1V	2V	3V
		LGPVVFSADIQEAFQK		58.16	583.65	1747.92	3	0		2V
A0A060Y6A8	Uncharacterized protein OS=Oncorhynchus mykiss GN=GSONMT00055804001 PE=3 SV=1	2
		SGVIAIPQATPATTTK	Acetyl (Protein N-term)	64.24	799.44	1596.87	2	0	1V	2V	3V
		SLAASGYDVVK		62	555.29	1108.58	2	0	1V	2V
A0A060Y7C6	40S ribosomal protein S3a OS=Oncorhynchus mykiss GN=RPS3A PE=3 SV=1^Atr|A9Z0N3	2
		VFEVSLADLQNDEVAFRK		72.73	694.03	2079.05	3	-0.01	1V
		EVQTNDLKEVVNK		48.63	505.94	1514.79	3	0	1V
A0A0C5BIF3	Heat shock protein 70 OS=Huso dauricus GN=HSP70 PE=2 SV=1	2
		IINEPTAAAIAYGLDKK		77.68	596.67	1786.98	3	0	1V
		DAGTIAGLNVLR		61.93	600.34	1198.67	2	0	1V	2V	3V
A0A0E9WET2	Uncharacterized protein OS=Anguilla anguilla PE=3 SV=1	2
		LLEPVLLLGK		71.61	547.86	1093.71	2	0	1V	2V
		GPLQSVQVFGR		64.9	594.33	1186.65	2	0		2V	3V
C1J0I5	Enolase 1 isoform a (Fragment) OS=Gillichthys mirabilis PE=2 SV=1	2
		AAVPSGASTGIYEALELR		58.84	602.65	1804.94	3	1.01	1V
		YISPDQLADLYK		55.54	713.37	1424.73	2	0.01	1V
H2RW50	Histone H4 OS=Takifugu rubripes PE=3 SV=1	2
		AMSVMNSFVNDIFER	2 Oxidation (M)	80.11	896.41	1790.8	2	0	1V	2V
		AMSVMNSFVNDIFER	Oxidation (M)	49.92	592.61	1774.8	3	0	1V
M3ZFN0	Uncharacterized protein OS=Xiphophorus maculatus PE=3 SV=1	2
		NKYEDELNKR		74.59	654.83	1307.65	2	0			3V
		NKYEDELNKR		71.66	436.89	1307.64	3	0	1V
P01860	Immunoglobulin heavy constant gamma 3 OS=Homo sapiens GN=IGHG3 PE=1 SV=2	2
		CPAPELLGGPSVFLFPPK		74.01	642.68	1925.03	3	0.01	1V	2V	3V
		CPAPELLGGPSVFLFPPK		57.18	963.49	1924.97	2	-0.04		2V	3V
P02141	Hemoglobin subunit beta-4 OS=Oncorhynchus mykiss GN=hbb4 PE=1 SV=3	2
		LGPAVFSADTQEAFQK		99.41	854.93	1707.85	2	0	1V	2V	3V
		LGPAVFSADTQEAFQK		74.78	570.29	1707.85	3	0		2V
P02142	Hemoglobin subunit beta-1 OS=Oncorhynchus mykiss GN=hbb1 PE=1 SV=1	2
		STISAVWGKVNIDEIGPLALAR		66.09	770.76	2309.27	3	0	1V
		VNIDEIGPLALAR		47.44	690.9	1379.78	2	0			3V
P02662	Alpha-S1-casein (Laboratory-Cont) OS=Bos taurus GN=CSN1S1 PE=1 SV=2^Asw|P02662	2
		YLGYLEQLLR		52.12	634.36	1266.7	2	0			3V
		FFVAPFPEVFGK		50.5	692.87	1383.73	2	0.01			3V
P04114	Apolipoprotein B-100 OS=Homo sapiens GN=APOB PE=1 SV=2	2
		TTLTAFGFASADLIEIGLEGK		58.12	1078.07	2154.12	2	0.99	1V
		GFEPTLEALFGK		54	654.85	1307.68	2	0.01		2V	3V
P08779	Keratin, type I cytoskeletal 16 OS=Homo sapiens GN=KRT16 PE=1 SV=4	2
		IIAATIENAQPILQIDNAR		109.06	688.72	2063.14	3	0			3V
		TEELNKEVASNSELVQSSR		106.78	707.35	2119.03	3	-0.01			3V
P31151	Protein S100-A7 OS=Homo sapiens GN=S100A7 PE=1 SV=4	2
		GTNYLADVFEK		56	628.81	1255.62	2	0.01		2V
		ENFPNFLSACDK		51.46	721.33	1440.65	2	0.01		2V
W5LYG2	Uncharacterized protein OS=Lepisosteus oculatus PE=4 SV=1	2
		DNSKNQLYLQMSSLK	Oxidation (M)	53.54	595.63	1783.88	3	0	1V
		DNSKNQLYLQMSSLK		47.36	590.3	1767.88	3	0			3V
A0A060W713	Uncharacterized protein OS=Oncorhynchus mykiss GN=GSONMT00068025001 PE=4 SV=1	1
		VVVGDVLNKEDVKK		82.22	386.23	1540.88	4	0	1V
A0A060W847	Uncharacterized protein OS=Oncorhynchus mykiss GN=GSONMT00068777001 PE=4 SV=1	1
		ELIAEAK		50.73	387.22	772.43	2	0	1V	2V	3V
A0A060WX95	Uncharacterized protein OS=Oncorhynchus mykiss GN=GSONMT00029674001 PE=3 SV=1	1
		AVFVDLEPTVIDEVR		77.13	851.46	1700.91	2	0.01	1V		3V
A0A060WXW6	Uncharacterized protein OS=Oncorhynchus mykiss GN=GSONMT00013312001 PE=3 SV=1	1
		GAVDGGLSIPHSTK		58.52	446.91	1337.7	3	0		2V
A0A060XGK1	Proteasome subunit alpha type OS=Oncorhynchus mykiss GN=GSONMT00008054001 PE=3 SV=1^Atr|B5XDD4	1
		LTVEDPVTVEYITR		51.29	817.93	1633.85	2	-0.01	1V
A0A060XMF0	Ribosomal protein L15 OS=Oncorhynchus mykiss GN=GSONMT00054816001 PE=3 SV=1	1
		GATYGKPVHHGVNQIK		70.82	427.24	1704.91	4	0.01		2V
A0A060XRV6	Uncharacterized protein OS=Oncorhynchus mykiss GN=GSONMT00052299001 PE=3 SV=1	1
		TYFSQWADLSPGSAPVK		56.74	927.45	1852.89	2	-0.01	1V
A0A060XXQ9	Uncharacterized protein OS=Oncorhynchus mykiss GN=GSONMT00031819001 PE=4 SV=1	1
		SEDTAVYYCAR		56.52	667.77	1333.53	2	-0.03		2V	3V
A0A060XZL2	Uncharacterized protein (Fragment) OS=Oncorhynchus mykiss GN=GSONMT00013545001 PE=3 SV=1	1
		TITLEVEPSDTIENVK		64.09	894.46	1786.9	2	-0.02	1V
A0A060Y7V1	Uncharacterized protein OS=Oncorhynchus mykiss GN=GSONMT00046116001 PE=4 SV=1	1
		QINWTVLYR		59.41	596.83	1191.64	2	0			3V
A0A060YDT1	Uncharacterized protein OS=Oncorhynchus mykiss GN=GSONMT00005272001 PE=4 SV=1	1
		QITINDLPVGR		63.54	613.35	1224.68	2	0	1V		3V
A0A068FNU8	Interferon-induced protein with tetratricopeptide repeats OS=Danio rerio GN=ifit9 PE=2 SV=1	1
		QEAQNLIK		50.92	472.26	942.51	2	0		2V
A0A075B6S2	Immunoglobulin kappa variable 2D-29 OS=Homo sapiens GN=IGKV2D-29 PE=3 SV=1	1
		FSGSGSGTDFTLK		99.1	652.32	1302.62	2	0.01	1V		3V
A0A076EB04	Histone H3 (Fragment) OS=Blepsias cirrhosus PE=3 SV=1	1
		STELIIR		54.87	416.25	830.49	2	0	1V	2V	3V
A0A087XME4	40S ribosomal protein S4 OS=Poecilia formosa PE=3 SV=1	1
		LSNIFVIGK		51.34	495.81	989.6	2	0.01	1V	2V
A0A087XVE3	Uncharacterized protein OS=Poecilia formosa PE=3 SV=2	1
		GTGIVSAPVPK		56.58	513.31	1024.6	2	0.01	1V
A0A096LTG7	Uncharacterized protein OS=Poecilia formosa PE=3 SV=1	1
		GVVDSEDIPLNLSR		100.79	757.4	1512.78	2	0	1V	2V	3V
A0A0B4J1Y9	Immunoglobulin heavy variable 3-72 OS=Homo sapiens GN=IGHV3-72 PE=3 SV=1	1
		NSLYLQMNSLK	Oxidation (M)	57.68	663.84	1325.66	2	0	1V	2V	3V
A0A0F8AWP4	Ig kappa chain V-IV region JI OS=Larimichthys crocea GN=EH28_05339 PE=4 SV=1	1
		LLIYWASTR		48.16	561.82	1121.62	2	0	1V
A0A0G2QMM2	Histone H3 (Fragment) OS=Allocyttus folletti PE=3 SV=1	1
		YRPGTVAIR		52.87	516.8	1031.59	2	0			3V
A0A0G2QMP1	Histone H3 (Fragment) OS=Monocentris japonica PE=3 SV=1	1
		EIAKDFKTDLR	Glu->pyro-Glu (N-term E)	74.9	439.9	1316.68	3	-0.03		2V
A0A0K0NJB6	Type I cytokeratin (Fragment) OS=Ptychobarbus dipogon PE=3 SV=1	1
		VLDELTIAR		62.01	515.3	1028.59	2	0	1V	2V	3V
A0A0P7TLE4	40S ribosomal protein S26 OS=Scleropages formosus GN=Z043_120130 PE=3 SV=1	1
		DISEASVFDSYVLPK		56.55	835.93	1669.85	2	1.03		2V
A0A0P7UMM5	Actin, cytoplasmic 2-like OS=Scleropages formosus GN=Z043_118570 PE=3 SV=1	1
		VAPEEHPVILTEAPLNPK		90.58	652.03	1953.06	3	0	1V	2V	3V
A0A0P7V3N2	Keratin, type II cytoskeletal 8-like (Fragment) OS=Scleropages formosus GN=Z043_111930 PE=3 SV=1	1
		LALDIEIATYR		72.01	639.36	1276.71	2	0	1V	2V	3V
A0A0P7W925	Histone H2A (Fragment) OS=Scleropages formosus GN=Z043_124827 PE=3 SV=1	1
		AGLQFPVGR		80.78	472.77	943.53	2	0	1V	2V	3V
A0A0S7EQ42	Ribosomal protein L15 OS=Poeciliopsis prolifica GN=RL15 PE=3 SV=1	1
		GATYGKPVHHGVNQLK		70.82	427.24	1704.91	4	0.01		2V
A0A0S7KU54	CERU OS=Poeciliopsis prolifica GN=CERU PE=3 SV=1	1
		DIASGLIGPLLICK		91.56	735.42	1468.83	2	0	1V	2V	3V
A0A143WEA0	Ribosomal protein L7 (Fragment) OS=Anguilla rostrata GN=rpl7 PE=2 SV=1	1
		IALTDNALVEK		47.96	593.84	1185.66	2	0		2V
A0A146MHY4	78 kDa glucose-regulated protein (Fragment) OS=Fundulus heteroclitus PE=3 SV=1	1
		DAGTIAGLNVIR		61.93	600.34	1198.67	2	0	1V	2V	3V
A0A146YS88	Actin, cytoplasmic 2 (Fragment) OS=Fundulus heteroclitus PE=3 SV=1	1
		AVFPSLVGRPR		62.81	400.24	1197.7	3	0	1V
A0A160DAA8	Beta-actin (Fragment) OS=Dormitator latifrons PE=3 SV=1^Atr|A0A166T9F6^Atr|A0A160DAG2	1
		TTGIVMDSGDVGTHTVPIYEGYALPHAILR	Oxidation (M)	71.44	800.66	3198.6	4	0	1V	2V
A0A160DAB7	Beta-actin (Fragment) OS=Dormitator maculatus PE=3 SV=1	1
		TTGIVMDSGDGDTHTVPIYEGYALPHAILR		71.05	800.66	3198.6	4	0.04	1V
A0A1A7WCM1	Progesterone immunomodulatory binding factor 1 OS=Aphyosemion striatum GN=PIBF1 PE=4 SV=1	1
		QEMEAVLLR		50.5	544.78	1087.55	2	-0.02		2V
A0A1A7WE08	Zgc:92533 OS=Aphyosemion striatum GN=ZGC:92533 PE=3 SV=1	1
		QSVEADIAQLK		60.9	601.31	1200.61	2	-0.02			3V
A0A1A7ZZ80	Myomesin 3 (Fragment) OS=Nothobranchius furzeri GN=MYOM3 PE=4 SV=1	1
		LQDGEYDK		54.62	484.23	966.45	2	0.02		2V
A0A1A8BA63	Coagulation factor V OS=Nothobranchius furzeri GN=F5 PE=3 SV=1	1
		DIASGLIGPILICK		91.56	735.42	1468.83	2	0	1V	2V	3V
A0A1A8ETV4	Ras association (RalGDS/AF-6) domain family (N-terminal) member 8 OS=Nothobranchius korthausae GN=CABZ01003826.1 PE=4 SV=1	1
		LQELQGR		54.64	422.24	842.46	2	0	1V	2V	3V
A0A1D8EJ41	Beta-actin (Fragment) OS=Poecilia formosa PE=2 SV=1	1
		SYELPDGKVITIGNER		103.3	895.95	1789.89	2	-0.04	1V	2V	3V
A6QL59	Histone H2A OS=Danio rerio GN=zgc:165551 PE=2 SV=1	1
		AGIQFPVGR		80.78	472.77	943.53	2	0	1V	2V	3V
B2BP38	Hemoglobin beta chain OS=Pimephales promelas PE=2 SV=1	1
		FIAVVVSALGR		87.81	566.35	1130.68	2	0	1V	2V	3V
C1BEX3	Hemoglobin subunit beta-4 OS=Oncorhynchus mykiss GN=HBB4 PE=2 SV=1	1
		NTYTTLSVMHSEK	Oxidation (M)	75.82	509.58	1525.71	3	0	1V
C1BF11	Hemoglobin subunit alpha-4 OS=Oncorhynchus mykiss GN=HBA4 PE=2 SV=1	1
		SDEIGEQTLSR		86.87	617.8	1233.58	2	0	1V	2V	3V
C1BG49	Hemoglobin subunit alpha-4 OS=Oncorhynchus mykiss GN=HBA4 PE=2 SV=1	1
		LMVDPTNFK	Oxidation (M)	56.5	540.77	1079.53	2	0		2V
C1BG67	Hemoglobin subunit beta-4 OS=Oncorhynchus mykiss GN=HBB4 PE=2 SV=1	1
		LGPTVFSADTQEAFQK		113.5	869.94	1737.86	2	0	1V	2V	3V
C1BLG8	Glyceraldehyde-3-phosphate dehydrogenase OS=Osmerus mordax GN=G3P PE=2 SV=1	1
		VPVADVSVVDLTCR		57.68	765.41	1528.8	2	0		2V
C9JC84	Fibrinogen gamma chain OS=Homo sapiens GN=FGG PE=1 SV=1	1
		EGFGHLSPTGTTEFWLGNEK		55.36	736.35	2206.02	3	-0.01		2V
F8U8U5	Poly ubiquitin (Fragment) OS=Chelon labrosus PE=2 SV=1	1
		TITLEVEPSDTIENAR		64.09	894.46	1786.9	2	0.01	1V
F8W696	Apolipoprotein A-I OS=Homo sapiens GN=APOA1 PE=1 SV=1	1
		PALEDLR		47.21	407.23	812.44	2	0		2V
F8W6P5	Hemoglobin subunit beta (Fragment) OS=Homo sapiens GN=HBB PE=1 SV=1	1
		VLGAFSDGLAHLDNLK		65.67	557.3	1668.87	3	-0.01			3V
G3P4H1	Uncharacterized protein (Fragment) OS=Gasterosteus aculeatus PE=4 SV=1	1
		LLIYWATSR		48.16	561.82	1121.62	2	0	1V
G3P570	Uncharacterized protein OS=Gasterosteus aculeatus PE=4 SV=1	1
		GFEPTIEALFGK		54	654.85	1307.68	2	0.01		2V	3V
H0Y7L5	Apolipoprotein E (Fragment) OS=Homo sapiens GN=APOE PE=1 SV=2	1
		LGPLVEQGR		55.53	485.28	968.54	2	1	1V
H0YKS4	Annexin (Fragment) OS=Homo sapiens GN=ANXA2 PE=1 SV=1	1
		GVDEVTIVNILTNR		50.14	771.92	1541.83	2	-0.01	1V
H2LLZ8	Uncharacterized protein OS=Oryzias latipes GN=eno1 PE=3 SV=1	1
		YISPDKLADLYK		55.54	713.37	1424.73	2	-0.03	1V
H2TAQ0	Uncharacterized protein OS=Takifugu rubripes GN=slk PE=4 SV=1	1
		EIIAEAK		50.73	387.22	772.43	2	0	1V	2V	3V
H2TZ44	Uncharacterized protein OS=Takifugu rubripes GN=dzip1 PE=4 SV=1	1
		TLSSNSPAK		49.41	452.75	903.48	2	0.01	1V
H3CGR2	Uncharacterized protein OS=Tetraodon nigroviridis PE=4 SV=1	1
		LGPLTPLEFYR		55.12	653.36	1304.71	2	0	1V
H7C3T4	Peroxiredoxin-4 (Fragment) OS=Homo sapiens GN=PRDX4 PE=1 SV=1	1
		QITLNDLPVGR		63.54	613.35	1224.68	2	0	1V		3V
I0DHI0	Nucleoprotein OS=Viral hemorrhagic septicemia virus PE=4 SV=1	1
		YSVDSLEGLEGIK		61.63	705.36	1408.71	2	0	1V
I6WP32	Cardiac muscle myosin heavy chain 6 alpha (Fragment) OS=Hoplostethus atlanticus GN=myh6 PE=4 SV=1	1
		LIGAIMR		53.02	387.24	772.47	2	0		2V	3V
J3KSD8	Bleomycin hydrolase (Fragment) OS=Homo sapiens GN=BLMH PE=1 SV=8	1
		IGPITPLEFYR		55.12	653.36	1304.71	2	0	1V
K7EPH2	Phenylalanine--tRNA ligase alpha subunit (Fragment) OS=Homo sapiens GN=FARSA PE=1 SV=8	1
		GAELLLR	Acetyl (Protein N-term)	53.68	407.25	812.48	2	0	1V
M4A1M1	Transketolase OS=Xiphophorus maculatus PE=3 SV=1	1
		LAVSGVPR		49.54	399.75	797.48	2	0		2V	3V
P01023	Alpha-2-macroglobulin OS=Homo sapiens GN=A2M PE=1 SV=3	1
		YGAATFTR		53.24	443.73	885.44	2	0	1V	2V	3V
P01024	Complement C3 OS=Homo sapiens GN=C3 PE=1 SV=2	1
		LVAYYTLIGASGQR		92.98	756.42	1510.82	2	0	1V	2V	3V
P01834	Immunoglobulin kappa constant OS=Homo sapiens GN=IGKC PE=1 SV=2	1
		SGTASVVCLLNNFYPR		89.37	899.45	1796.88	2	0		2V	3V
P01861	Immunoglobulin heavy constant gamma 4 OS=Homo sapiens GN=IGHG4 PE=1 SV=1	1
		STSESTAALGCLVK		66.82	712.36	1422.7	2	0		2V
P02666	Beta-casein (Laboratory-Cont) OS=Bos taurus GN=CSN2 PE=1 SV=2^Asw|P02666	1
		DMPIQAFLLYQEPVLGPVR	Oxidation (M)	73.72	734.73	2201.17	3	0.01		2V	3V
P02765	Alpha-2-HS-glycoprotein OS=Homo sapiens GN=AHSG PE=1 SV=1	1
		CNLLAEK		52.16	424.22	846.43	2	0	1V
P02787	Serotransferrin OS=Homo sapiens GN=TF PE=1 SV=3	1
		GDVAFVK		53.68	368.21	734.4	2	0	1V
P04406	Glyceraldehyde-3-phosphate dehydrogenase OS=Homo sapiens GN=GAPDH PE=1 SV=3	1
		LTGMAFR	Oxidation (M)	50.86	406.21	810.41	2	0		2V
P06702	Protein S100-A9 OS=Homo sapiens GN=S100A9 PE=1 SV=1	1
		NIETIINTFHQYSVK		75.25	602.99	1805.94	3	0.01	1V	2V	3V
P08238	Heat shock protein HSP 90-beta OS=Homo sapiens GN=HSP90AB1 PE=1 SV=4	1
		GVVDSEDLPLNISR		100.79	757.4	1512.78	2	0	1V	2V	3V
P25311	Zinc-alpha-2-glycoprotein OS=Homo sapiens GN=AZGP1 PE=1 SV=2	1
		HVEDVPAFQALGSLNDLQFFR		86.71	801.74	2402.21	3	0.01			3V
P27371	Nucleoprotein OS=Viral hemorrhagic septicemia virus (strain Makah) GN=N PE=2 SV=1	1
		EFTELVAEVLVDKYER		55.66	647.66	1939.97	3	0.97			3V
P29508	Serpin B3 OS=Homo sapiens GN=SERPINB3 PE=1 SV=2	1
		TYLFLQEYLDAIKK		48.16	582.31	1743.92	3	-0.03			3V
Q1JQ20	Synembryn-like OS=Danio rerio GN=ric8b PE=2 SV=1	1
		LIAGIMR		53.02	387.24	772.47	2	0		2V	3V
Q2A665	Glyceraldehyde-3-phosphate dehydrogenase OS=Salmo salar GN=gapdh PE=2 SV=1	1
		ITGMAFR	Oxidation (M)	50.86	406.21	810.41	2	0		2V
Q5D862	Filaggrin-2 OS=Homo sapiens GN=FLG2 PE=1 SV=1	1
		SVVTVIDVFYK		76.21	635.36	1268.71	2	0	1V		3V
Q5GAW2	Histone H3 (Fragment) OS=Oreochromis mossambicus PE=3 SV=1	1
		EIAQDFKTELR		58.41	675.36	1348.7	2	0	1V
Q5I122	Hemoglobin beta chain OS=Sciaenops ocellatus PE=2 SV=1	1
		IHVDPDNFR		58.31	556.78	1111.54	2	0	1V	2V	3V
Q5SEP6	Histone H3 (Fragment) OS=Grammistes sexlineatus PE=3 SV=1	1
		STEILIR		54.87	416.25	830.49	2	0	1V	2V	3V
Q7LZL9	Hemoglobin A1-4 beta chain (Fragment) OS=Oncorhynchus nerka PE=1 SV=1	1
		VMWTDAER		53.41	504.23	1006.44	2	-0.02	1V	2V
Q8N1N4	Keratin, type II cytoskeletal 78 OS=Homo sapiens GN=KRT78 PE=2 SV=2	1
		YLDFSSIITEVR		58.2	721.89	1441.77	2	0.03			3V
R4GE02	Uncharacterized protein OS=Danio rerio GN=si:ch211-113a14.11 PE=1 SV=1	1
		NDEELNKLLGGVTIAQGGVLPNIQAVLLPK		71.95	1038.59	3112.75	3	0	1V
W5JYL4	Uncharacterized protein OS=Astyanax mexicanus PE=3 SV=1	1
		GPIQSVQVFGR		64.9	594.33	1186.65	2	0		2V	3V
W5K8Y1	Uncharacterized protein OS=Astyanax mexicanus GN=MYOM2 (1 of many) PE=4 SV=1	1
		DSKITASER		48.08	503.75	1005.49	2	-0.02		2V
W5M762	Uncharacterized protein OS=Lepisosteus oculatus PE=4 SV=1	1
		ELLAEAK		50.73	387.22	772.43	2	0	1V	2V	3V
W5MJR6	Uncharacterized protein OS=Lepisosteus oculatus PE=4 SV=1	1
		LIIQEVR		52.46	435.77	869.53	2	0	1V	2V	3V
W5N1H4	Annexin OS=Lepisosteus oculatus PE=3 SV=1	1
		LIAGLMR		53.02	387.24	772.47	2	0		2V	3V
